# Supplementary material for: Daratumumab in first-line treatment of patients with light chain amyloidosis and Mayo stage IIIb improves treatment response and overall survival
Source: PubMed Central journal article supplement — Haematologica. 2023 Jul 13;109(1):220–30. doi: 10.3324/haematol.2023.283325 (PMC10772504; doi:10.3324/haematol.2023.283325), 2023-07-13
Supplement: 2023_283325_OUBARI_SUPPL.pdf [file 2023_283325_OUBARI_SUPPL.pdf]

# Daratumumab in first-line treatment of patients with light chain amyloidosis and Mayo stage IIb improves treatment response and overall survival

Sara Oubari,<sup>1,2</sup> Ute Hegenbart,<sup>3</sup> Renate Schoder,<sup>4</sup> Maximilian Steinhardt,<sup>5</sup> Maria Papathanasiou,<sup>2,6</sup> Tienush Rassaf,<sup>6</sup> Andreas Thimm,<sup>2,7</sup> Tim Hagenacker,<sup>2,7</sup> Eyad Naser,<sup>8</sup> Ulrich Dührsen,<sup>1</sup> Hans C. Reinhardt<sup>1,9</sup> Martin Kortüm,<sup>5</sup> Hermine Agis,<sup>4</sup> Stefan Schönland<sup>3</sup> and Alexander Carpinteiro<sup>1,2,8</sup>

<sup>1</sup>Department of Hematology and Stem Cell Transplantation, West German Cancer Center, University Hospital Essen, University Duisburg-Essen, Essen, Germany; <sup>2</sup>Interdisciplinary Amyloidosis Network, University Hospital Essen, University Duisburg-Essen, Essen, Germany; <sup>3</sup>Department of Internal Medicine V, Amyloidosis Center Heidelberg, University Hospital Heidelberg, Heidelberg, Germany; <sup>4</sup>Department of Internal Medicine I, Division of Hematology and Hemostaseology, Medical University Vienna, Vienna, Austria; <sup>5</sup>Department of Hematology, University Hospital Würzburg, Würzburg, Germany; <sup>6</sup>Department of Cardiology and Vascular Medicine, West German Heart and Vascular Center, University Hospital Essen, University Duisburg-Essen, Essen, Germany; <sup>7</sup>Department of Neurology and Center for Translational Neuro- and Behavioral Science, University Hospital Essen, Essen, Germany; <sup>8</sup>Institute of Molecular Biology, University of Duisburg-Essen, Essen, Germany and <sup>9</sup>German Cancer Consortium (DKTK), Partner Site University Hospital Essen, Essen, Germany

**Correspondence:** A. Carpinteiro  
[alexander.carpinteiro@uk-essen.de](mailto:alexander.carpinteiro@uk-essen.de)

**Received:** April 10, 2023.

**Accepted:** July 3, 2023

**Early view:** July 13, 2023.

<https://doi.org/10.3324/haematol.2023.283325>

©2024 Ferrata Storti Foundation

Published under a CC BY-NC license

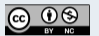

## Supplementary

| Best response regarding 1 <sup>st</sup> line regimen | CR | VGPR | PR | NR | N.a. | 2 <sup>nd</sup> line due to insufficient hematologic response or progression |
|------------------------------------------------------|----|------|----|----|------|------------------------------------------------------------------------------|
| Dara-CyBorD                                          | 1  | 0    | 0  | 1  | 2    | 0                                                                            |
| Dara-VMP                                             | 0  | 1    | 0  | 0  | 0    | 0                                                                            |
| Dara-VD                                              | 3  | 2    | 0  | 0  | 0    | 0                                                                            |
| Dara-CyD                                             | 1  | 0    | 0  | 0  | 0    | 0                                                                            |
| DaraD                                                | 8  | 0    | 3  | 1  | 3    | 5 DVd                                                                        |
| VD                                                   | 6  | 11   | 6  | 11 | 18   | 3 DRd, 1 Dd, 8 DVd, 1 Md                                                     |
| CyBorD                                               | 1  | 1    | 1  | 1  | 1    | 1 DRd                                                                        |
| PAD                                                  | 0  | 0    | 0  | 1  | 0    | 1 KRd                                                                        |
| MD                                                   | 0  | 2    | 1  | 2  | 2    | 1 DVd, 1 Dd, 1 Vd                                                            |
| Bendamustine                                         | 0  | 0    | 0  | 0  | 1    | 0                                                                            |

**Table S1. Best hematological responses after 1<sup>st</sup> line treatment and alternative treatment choices only in patients with insufficient response.**

3 patients in Vd group, 2 patients in CyBorD group and 1 patient in DaraD group were not evaluable due to Low-dFLC values.

Bor, bortezomib; CR, complete response; Cy, cyclophosphamide; Dara, daratumumab; D, dexamethasone; DRd: Daratumumab, Lenalidomid, dexamethasone; KRd, Carfilzomib, Lenalidomid, dexamethasone; M, melphalan; N.a., not available; NR, no response; PR, partial response; VGPR, very good partial response; VMP, bortezomib, melphalan, prednisone; PAD, bortezomib, doxorubicin, dexamethasone; V, bortezomib.

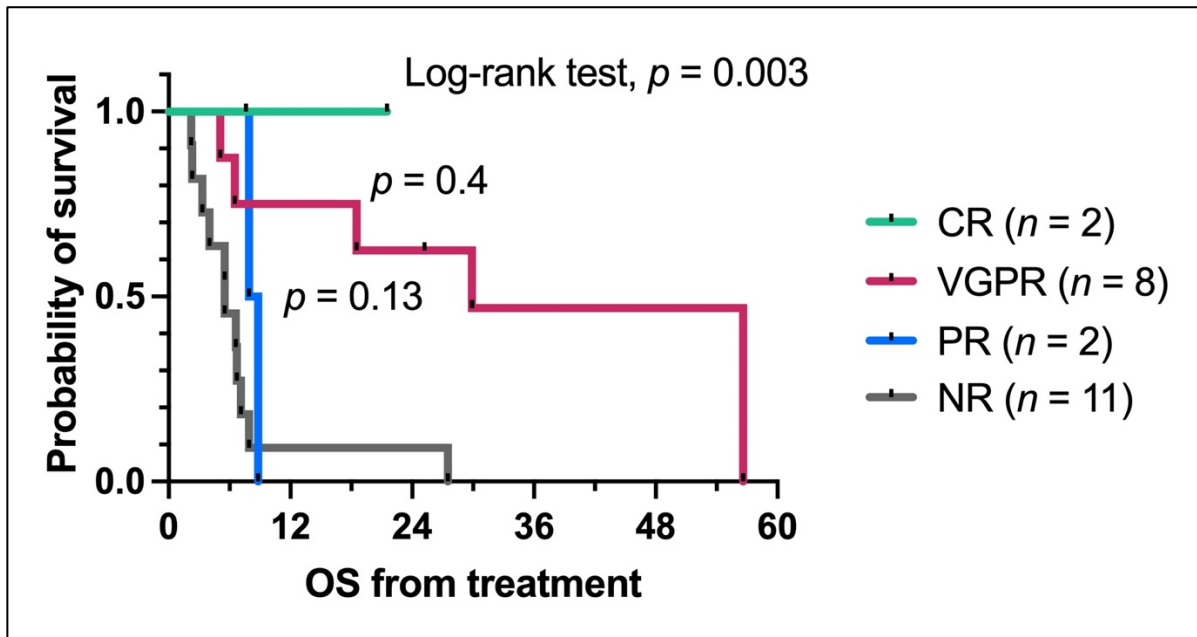

**Figure S1. Kaplan-Meier landmark analysis of overall survival regarding hematologic response at 2 months in patients with AL amyloidosis and Mayo stage IIIb.** Patients received daratumumab at first-line or later were excluded. CR, complete response; NR, no response; OS, overall survival; PR, partial response; VGPR, very good partial response.
